# Supplementary material for: Zero-dimensional organic–inorganic hybrid zinc halide with broadband yellow light emission
Source: Royal Society of Chemistry journal article supplement (doi:10.1039/d2ce01342h), 2022-11-23
Supplement: d2ce01342h1.pdf [file d2ce01342h1.pdf]

## Supporting Information

### **Zero-dimensional Organic-inorganic Hybrid Zinc Halide with Broadband Yellow Light Emission**

Yu-Hang Liu<sup>a,b</sup>, Wen-Qi Wang<sup>b</sup>, Bing-Lin Zhang<sup>b</sup>, Yu-Jiao Wang<sup>b</sup>,  
Meng-Ping Ren<sup>b</sup>, Zhihong Jing<sup>a\*</sup>, Cheng-Yang Yue<sup>b\*</sup>

<sup>a</sup> School of Chemistry and Chemical Engineering, Qufu Normal University, Qufu, Shandong, 273165, P. R. China

<sup>b</sup> School of Chemistry, Chemical Engineer and Materials, Jining University, Qufu, Shandong, 273155, P. R. China

*Corresponding Authors:* Zhihong Jing; Cheng-yang Yue

*E-mail:* zhhjing@126.com; yuechengyang@126.com

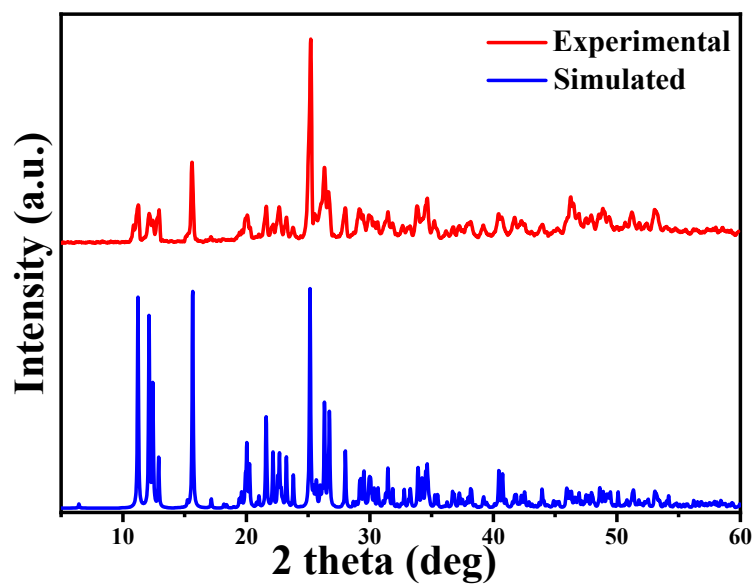

**Fig. S1.** The simulated and experimental power X-ray diffraction pattern of [N-EPD]<sub>2</sub>ZnBr<sub>4</sub>.

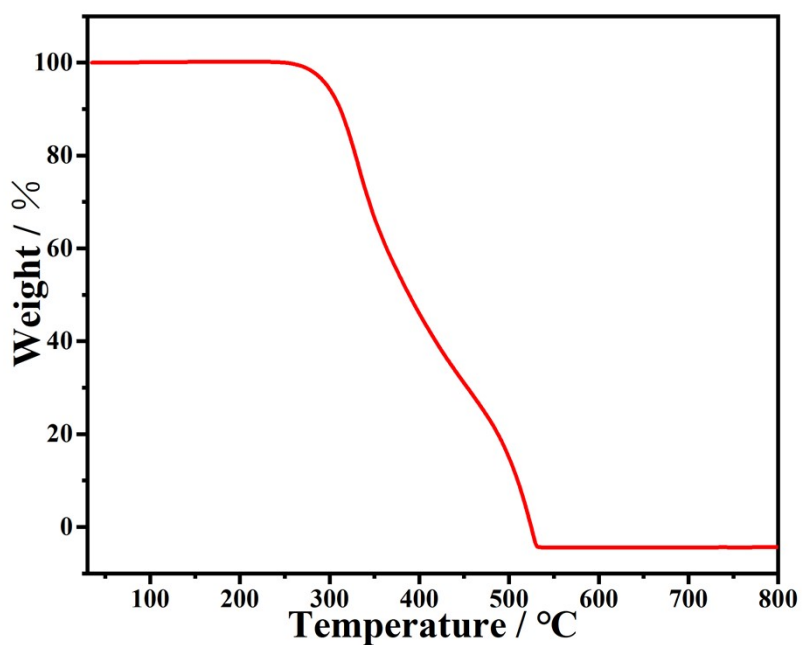

**Fig. S2.** The thermogravimetric analysis of [N-EPD]<sub>2</sub>ZnBr<sub>4</sub>.

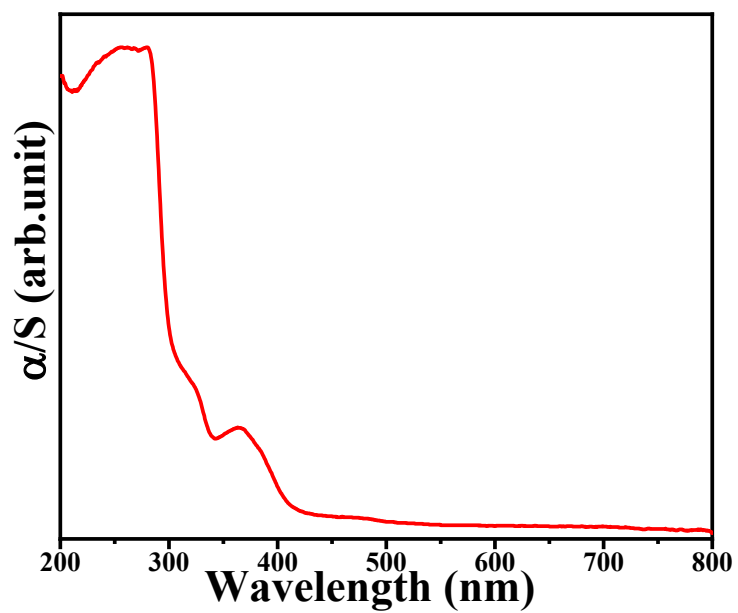

**Fig. S3.** The UV-vis absorption spectrum of  $[\text{N-EPD}]_2\text{ZnBr}_4$ .

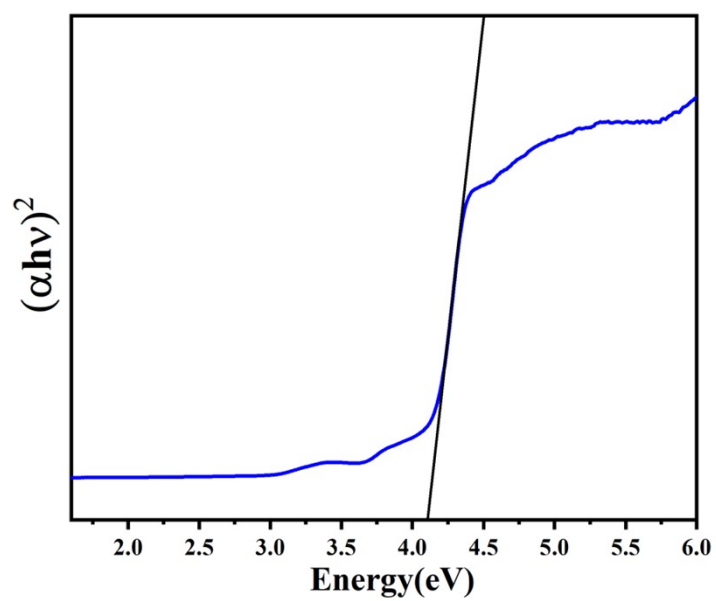

**Fig. S4.** The Tauc's plots for  $[\text{N-EPD}]_2\text{ZnBr}_4$ .

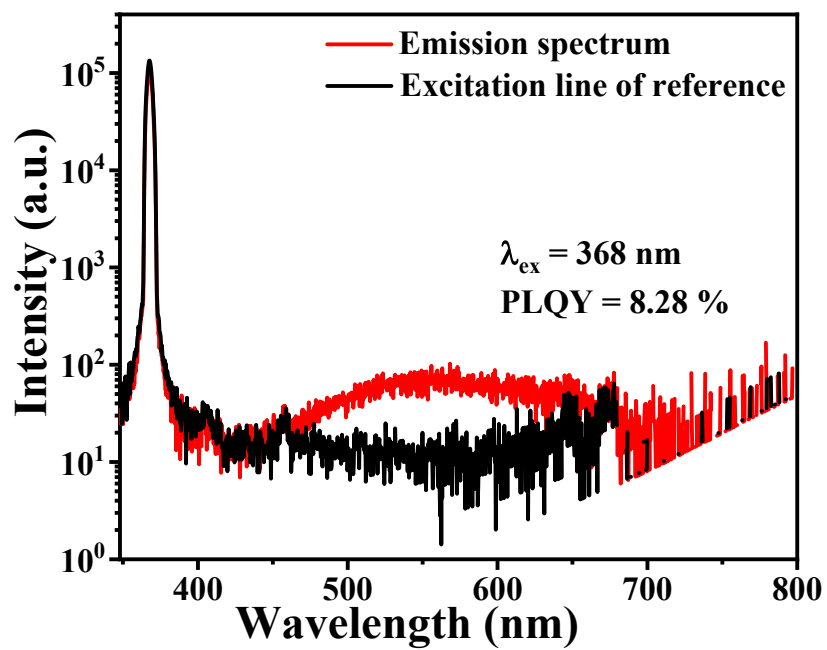

Fig. S5. The PLQY of [N-EPD]<sub>2</sub>ZnBr<sub>4</sub> at 300K.

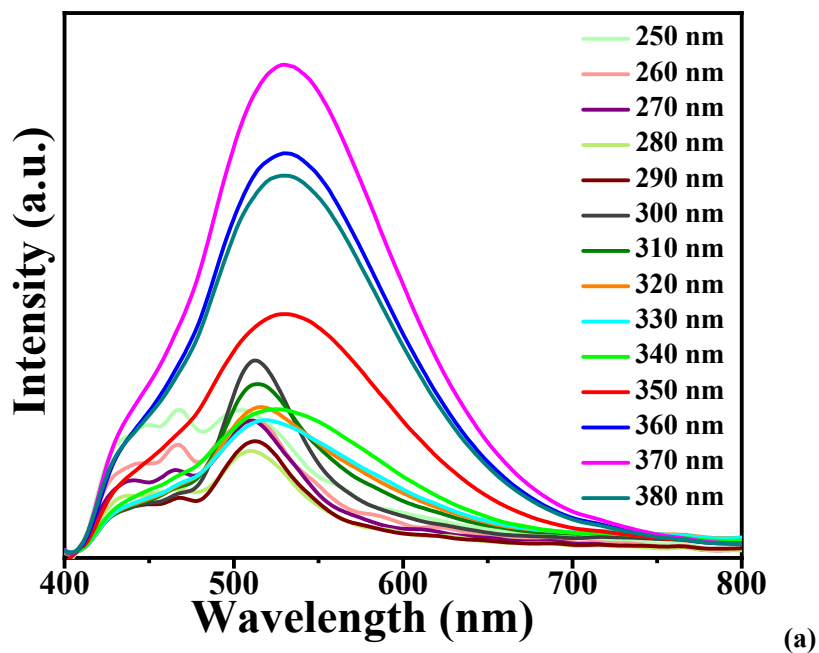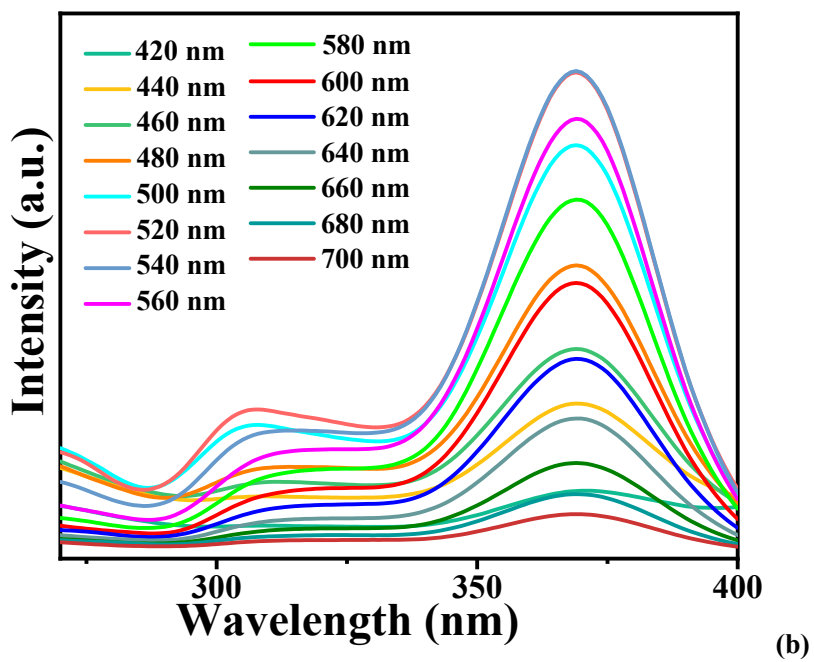

**Fig. S6.** The excitation wavelength dependent PL emission spectra (a) and the emission wavelength dependent PL excitation spectra (b) of  $[\text{N-EPD}]_2\text{ZnBr}_4$ .

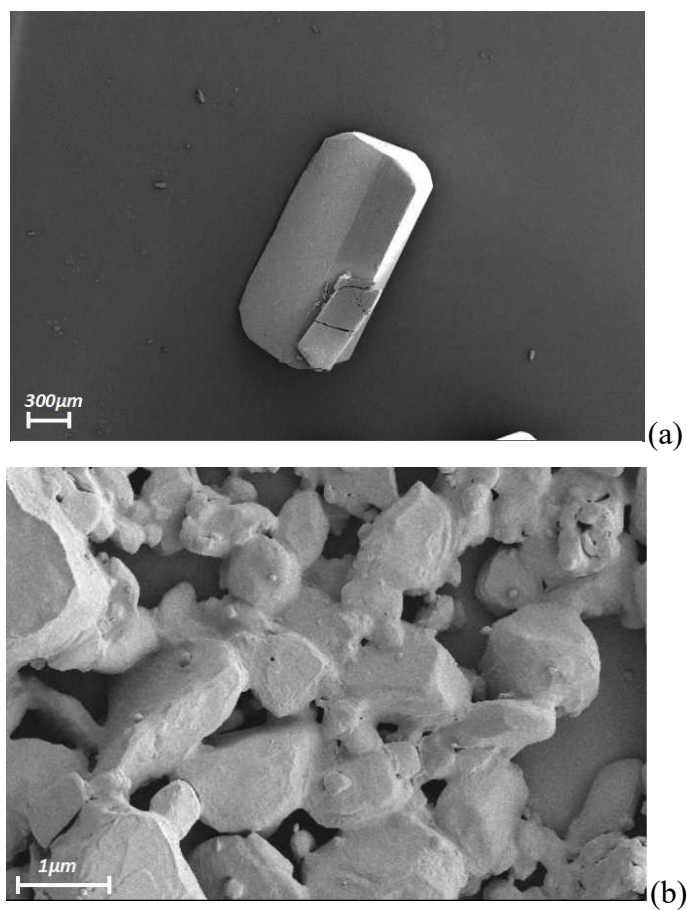

**Fig. S7.** The SEM photos of (a) bulk crystals and (b) microscale crystals of [N-EPD]<sub>2</sub>ZnBr<sub>4</sub>.

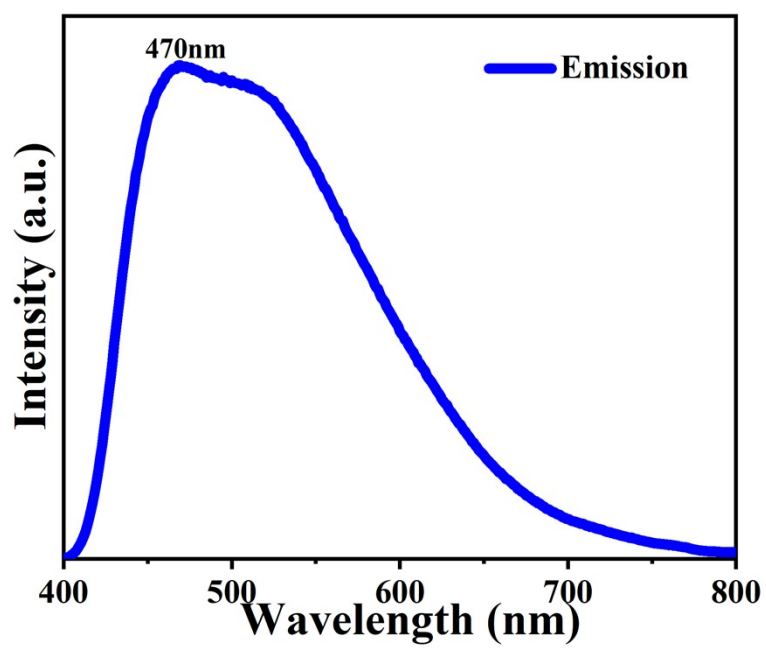

**Fig. S8.** PL emission spectrum of [N-EPD]Br at 300 K.

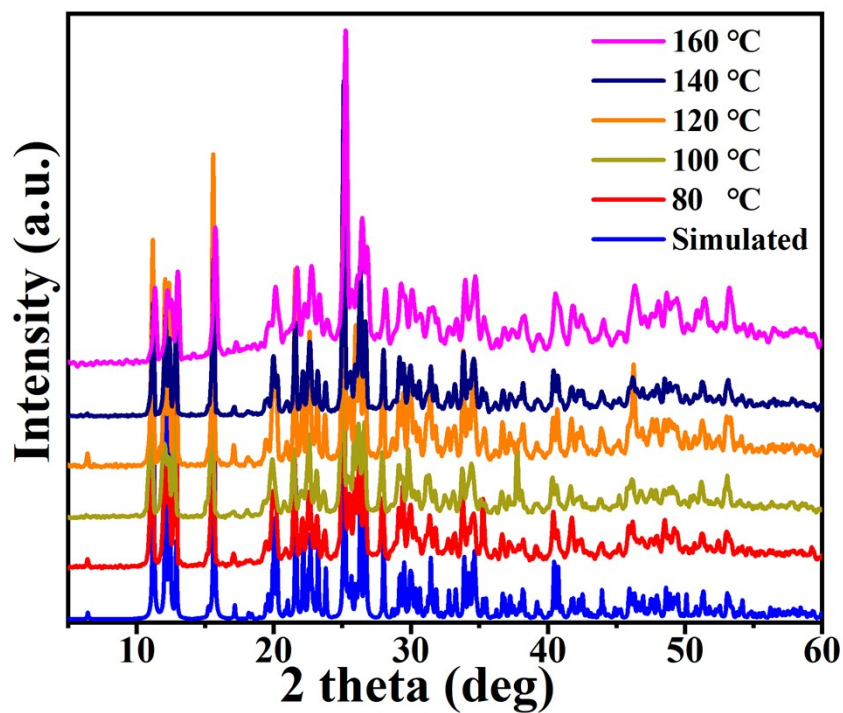

**Fig. S9.** The experimental PXRD patterns after continuous heating from 80 °C to 160 °C.

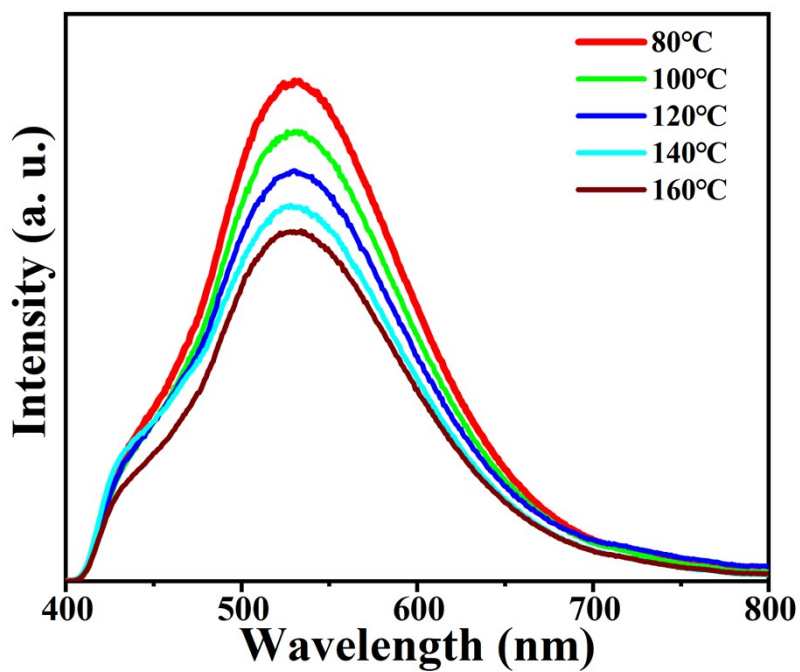

**Fig. S10.** The PL emission spectra of [N-EPD]<sub>2</sub>ZnBr<sub>4</sub> after continuous heating from 80 °C to 160 °C.

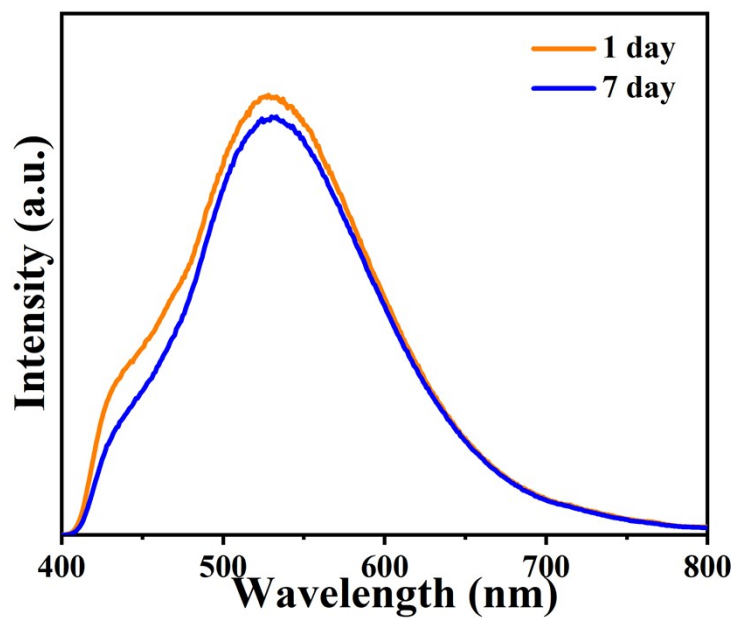

**Fig. S11.** The PL spectra of [N-EPD]<sub>2</sub>ZnBr<sub>4</sub> before and after storing in ambient atmosphere with relative humidity of about 50% for one week.



**Table S1.** Crystal Data and Structural Refinements for [N-EPD]<sub>2</sub>ZnBr<sub>4</sub>.

| Compound                                                                                 | [N-EPD] <sub>2</sub> ZnBr <sub>4</sub>                           |
|------------------------------------------------------------------------------------------|------------------------------------------------------------------|
| chemical formula                                                                         | C <sub>14</sub> H <sub>20</sub> N <sub>2</sub> ZnBr <sub>4</sub> |
| fw                                                                                       | 603.35                                                           |
| Space group                                                                              | C2/c                                                             |
| crystal system                                                                           | Monoclinic                                                       |
| <i>a</i> /Å                                                                              | 27.5957(4)                                                       |
| <i>b</i> Å                                                                               | 8.22990(10)                                                      |
| <i>c</i> /Å                                                                              | 17.9221(3)                                                       |
| <i>β</i> /°                                                                              | 96.3750(10)                                                      |
| <i>V</i> (Å <sup>3</sup> )                                                               | 4045.12(10)                                                      |
| D <sub>calcd</sub> (g·cm <sup>-3</sup> )                                                 | 1.9813                                                           |
| Temp (K)                                                                                 | 298.15                                                           |
| <i>μ</i> (mm <sup>-1</sup> )                                                             | 10.899                                                           |
| <i>F</i> (000)                                                                           | 2288.7                                                           |
| Reflections collected                                                                    | 10486                                                            |
| Unique reflections                                                                       | 3857                                                             |
| GOF on <i>F</i> <sup>2</sup>                                                             | 1.004                                                            |
| <sup>a</sup> <i>R</i> <sub>1</sub> , <i>wR</i> <sub>2</sub> ( <i>I</i> > 2σ( <i>I</i> )) | 0.0297/0.0833                                                    |
| <sup>b</sup> <i>R</i> <sub>1</sub> , <i>wR</i> <sub>2</sub> (all data)                   | 0.0324/0.0856                                                    |
| CCDC number                                                                              | 2208029                                                          |

$${}^a R_1 = \sum ||F_o| - |F_c|| / \sum |F_o|. \quad {}^b wR_2 = [\sum w(F_o^2 - F_c^2)^2 / \sum w(F_o^2)^2]^{1/2}.$$

**Table S2.** Selected bond lengths (Å) and bond angles (°) for compound [N-EPD]<sub>2</sub>ZnBr<sub>4</sub>.

|             |           |             |           |
|-------------|-----------|-------------|-----------|
| Zn1-Br1     | 2.4296(5) | Zn1-Br2     | 2.4158(5) |
| Zn1-Br3     | 2.4208(5) | Zn1-Br4     | 2.3947(6) |
| Br2-Zn1-Br1 | 109.11(2) | Br3-Zn1-Br1 | 107.52(2) |
| Br3-Zn1-Br2 | 109.12(2) | Br4-Zn1-Br1 | 107.82(2) |
| Br4-Zn1-Br2 | 112.49(2) | Br2-Zn1-Br1 | 110.64(2) |
